# Supplementary material for: Dynamical Connections between Large Marine Ecosystems of Austral South America based on numerical simulations
Source: Copernicus journal article supplement (doi:10.5194/os-2019-99), 2019-09-11
Supplement: Supplementary file 1 [file os-2019-99-supplement.pdf]

## Supplementary figures

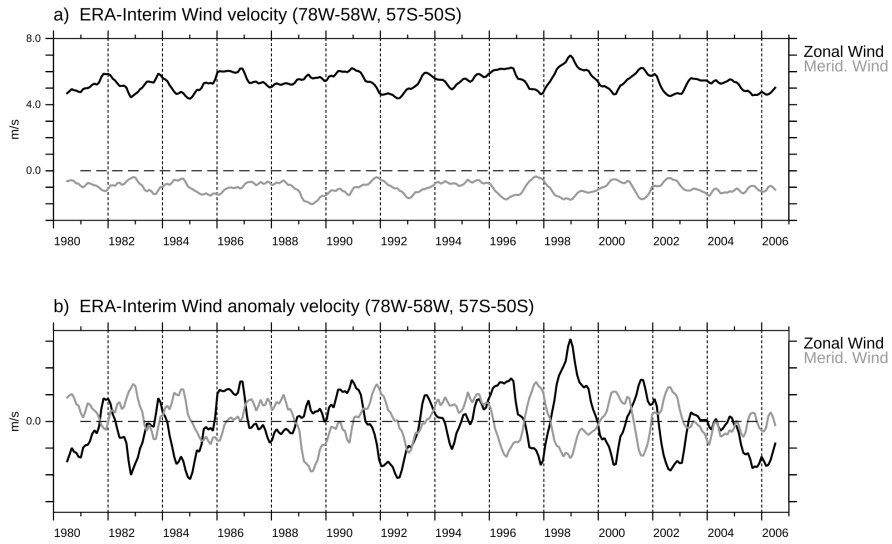

**Figure 1** – Area averaged ( $78 - 58^{\circ}\text{W}$ ,  $57 - 50^{\circ}\text{S}$ ) Era-Interim wind velocity. Wind velocity (panel a) and wind velocity anomalies (panel b). A 12-month running mean is applied to the data to filter the seasonal signal.

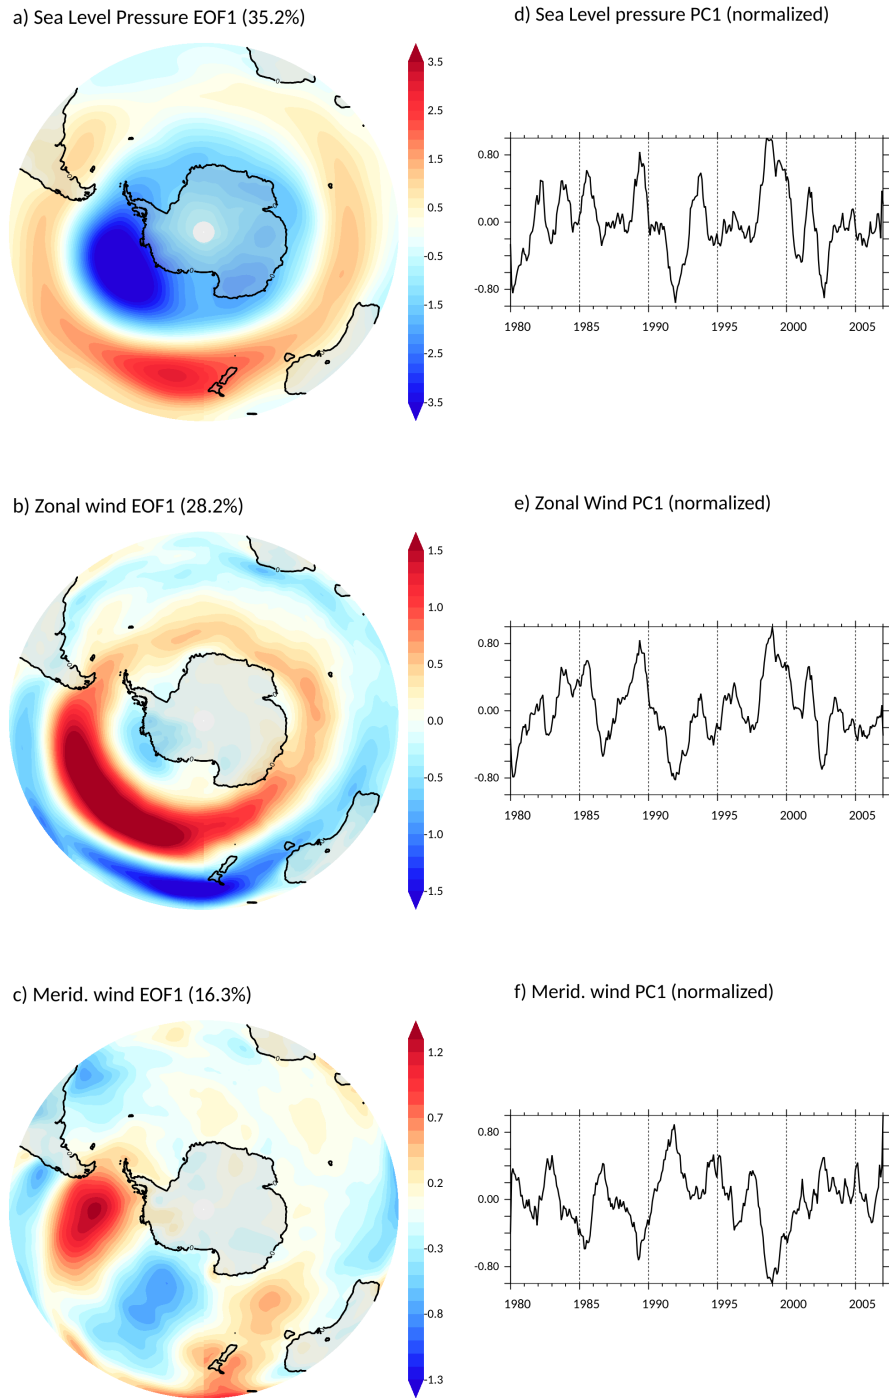

**Figure 2** – First EOF mode of sea-level pressure (a), zonal (b) and meridional (c) wind anomalies and annual means of first EOF mode of sea-level pressure (d), zonal (e) and meridional (f) wind anomalies, south of 20° based on the ERA-Interim reanalysis data during the period 1980-2006. A 12-month running mean is applied to the data to filter the seasonal signal.
