# Supplementary material for: Dynamical Connections between Large Marine Ecosystems of Austral South America based on numerical simulations
Source: Copernicus journal article supplement (doi:10.5194/os-2019-99), 2019-09-11
Supplement: Supplementary file [file os-2019-99-AC1-supplement.pdf]

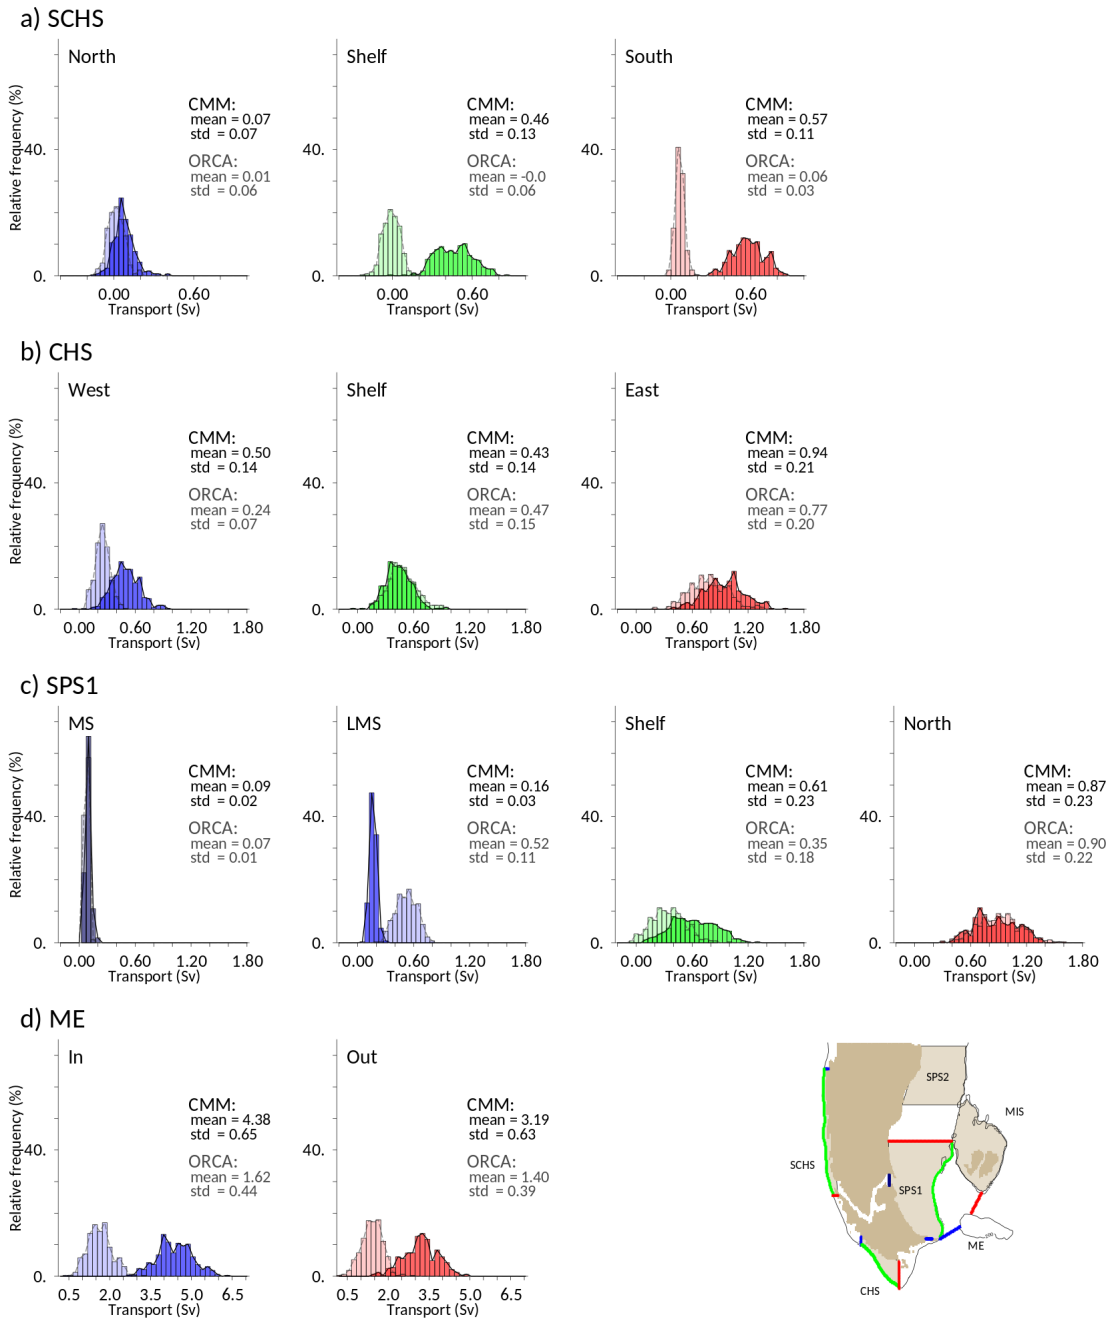

**Figure 1** – Histogram of transport over the 27 years, at key locations of a) the SCHS, b) the CHS, c) the SPS1, and d) the Malvinas Embayment, calculated along the colored sections indicated in the reference map. Opaque bins are from CMM, transparent bins from ORCA. Mean and standard deviation are indicated for each section. The transport is calculated over 200m for all sections except for the Malvinas Embayment sections, where it is computed throughout the water column.
