# Supplementary material for: Dynamical Connections between Large Marine Ecosystems of Austral South America based on numerical simulations
Source: Copernicus journal article supplement (doi:10.5194/os-2019-99), 2019-09-11
Supplement: Supplementary file [file os-2019-99-AC3-supplement.pdf]

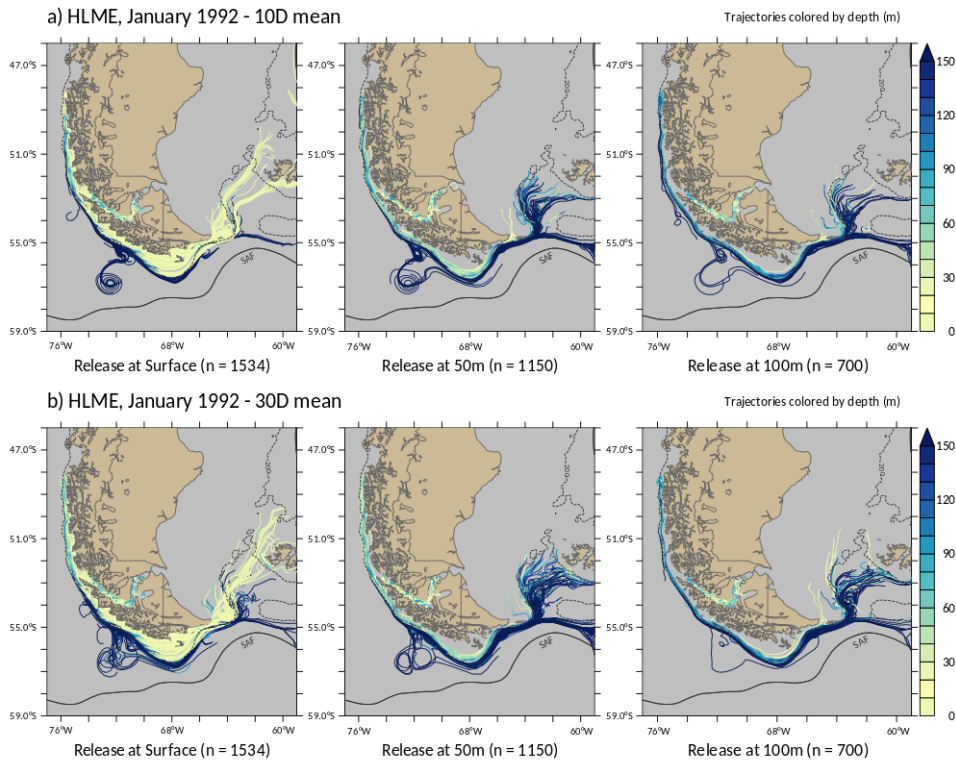

**Figure 1** – Lagrangian advection of particles during 90 days, released on the SCHS in January 1992. Panel a: advection calculated in 10-day mean fields from CMM, panel b: advection calculated in 30-day (1 month) mean fields from CMM. Particle trajectories are colored by depth (in m) for initial release at 0 (left), 50 (middle) and 100 (right) m (1 out of 20 trajectories shown). The number of particles ( $n$ ) for each experiment is shown and the SAF is indicated in black.

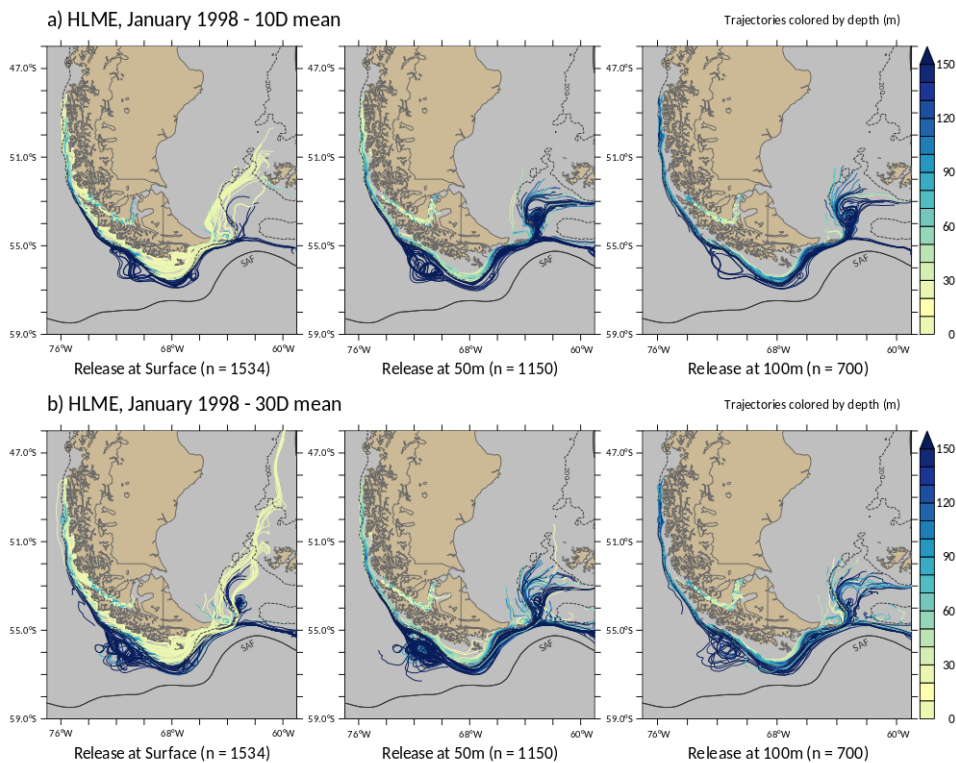

**Figure 2** – Same as fig 1, but for a release in January 1998.

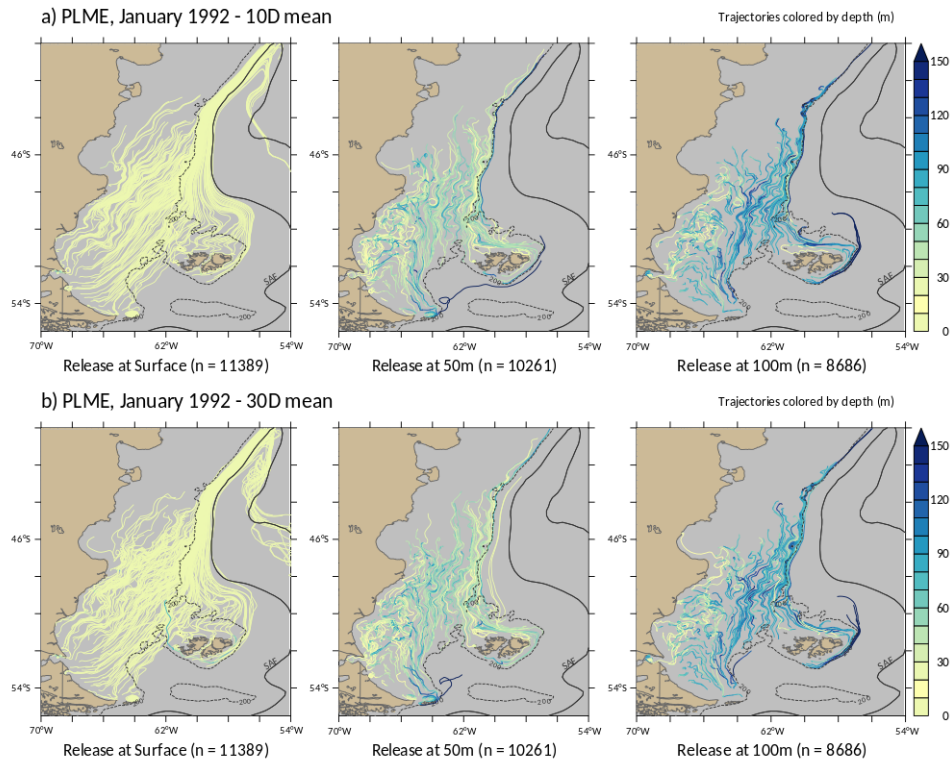

**Figure 3** – Lagrangian advection of particles during 90 days, released on the PS in January 1992. Panel a: advection calculated in 10-day mean fields from CMM, panel b: advection calculated in 30-day (1 month) mean fields from CMM. Particle trajectories are colored by depth (in m) for initial release at 0 (left), 50 (middle) and 100 (right) m (1 out of 20 trajectories shown). The number of particles ( $n$ ) for each experiment is shown and the SAF is indicated in black.

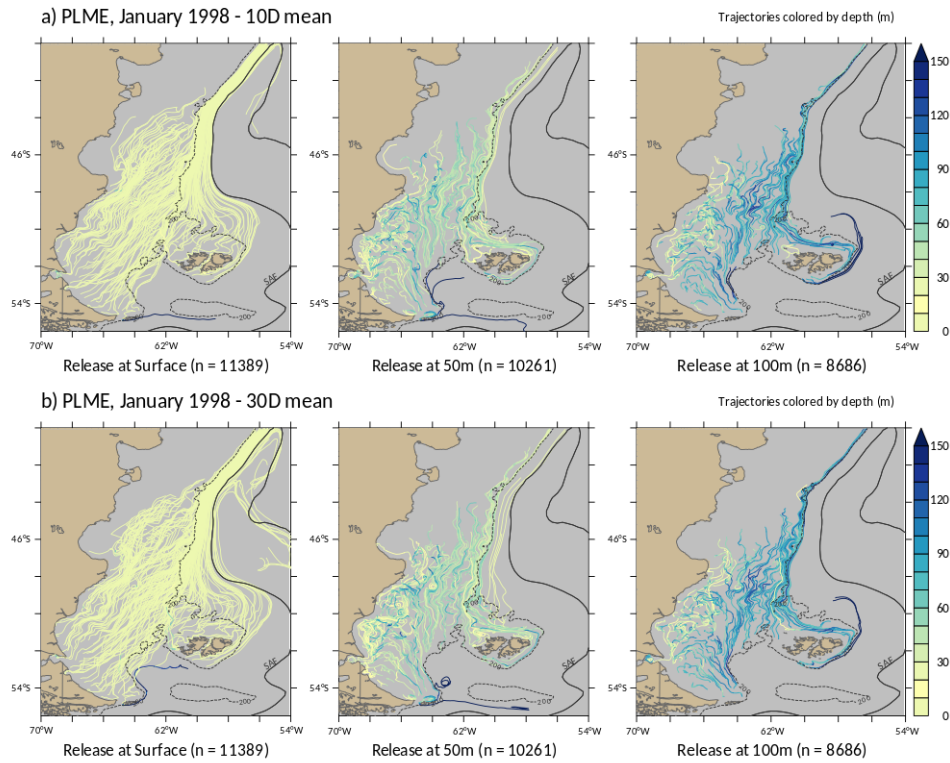

**Figure 4** – Same a fig 4, but for a release in January 1998.
